## 2012 ANNUAL JOURNAL SYMPOSIUM

### “Respiratory Depression”

The American Society of Anesthesiologists (ASA) and its journal, *ANESTHESIOLOGY*, announce the 21st annual Journal Symposium, to be held at the ASA Annual Meeting on Monday, October 15, 2012, in Washington, D.C. The 2012 Journal Symposium will highlight up-and-coming and noteworthy concepts in anesthesia research and clinical practice.

Various perioperative interventions associated with anesthesia and surgery significantly influence respiratory function. Patterns and severity of the perioperative respiratory depression may significantly depend on coexisting diseases, consciousness, and other structural and functional factors relating to breathing stability.

This symposium will explore mechanisms and clinical managements for preventing, detecting and treating respiratory depression that should change our clinical practice and patient outcomes.

Two invited speakers will lead the session: Kingman Strohl, M.D., Professor of Medicine and Physiology & Biophysics, Division of Pulmonary, Critical Care, and Sleep Medicine, University Hospitals Case Medical Center, Case Western Reserve University, will provide new evidence of the pathophysiology of respiratory depression that incorporates breathing patterning and genetic predisposition as factors operating in our clinical practice; and, Matthias Eikermann, M.D., Ph.D., Assistant Professor, Department of Anesthesia, Critical Care, and Pain Medicine, Massachusetts General Hospital, and Harvard Medical School, will discuss how anesthesia, surgery, and immobility influence perioperative respiratory muscle function.

Investigators from around the world with an interest in this subject are invited to submit their work to the ASA for the Annual Meeting. Abstracts from both basic and clinical sciences are welcome. Studies examining or evaluating mechanisms and clinical managements of respiratory depression are encouraged. Abstracts should be submitted *via* the usual online process (which can be accessed through the Web sites [www.asahq.org](http://www.asahq.org) and [www.anesthesiology.org](http://www.anesthesiology.org)). Interested individuals should make sure to check the “Journal Symposium” box on the abstract submission form to be considered for inclusion in this special session. The deadline for abstract submission is March 31, 2012. Abstract selections will be made by the symposium organizers in conjunction with members of the *ANESTHESIOLOGY* Editorial Board.

The authors of abstracts selected for the symposium will be offered an opportunity to submit their work to *ANESTHESIOLOGY* for inclusion in an issue to be published in the spring of 2013.

## NOMINATIONS SOUGHT FOR 2012 Award for Excellence in Research

The annual American Society of Anesthesiologists (ASA) Award for Excellence in Research recognizes an individual for outstanding achievement in research that has or is likely to have an important impact on the practice of anesthesiology.

The individual's work must represent a body of original, mature, and sustained contribution to the advancement of the science of anesthesiology. The nominee need not be a physician, an anesthesiologist, or a member of the ASA, but must be presently engaged in research related to anesthesiology, academically accomplished with peer-reviewed publications and funded research, and nominated in response to a call for nominations. The completed application must include the nominee's current curriculum vitae, a letter of nomination, and a seconding letter from two individuals with an understanding of the research contributions of the individual.

The 2011 Award for Excellence in Research was presented to Evan D. Kharasch, M.D., Ph.D., at the ASA Annual Meeting in Chicago, Illinois, on Monday, October 17, 2011. Dr. Kharasch is Professor and Director at the Department of Anesthesiology, Washington University in St. Louis, St. Louis, Missouri.

The deadline for nominations for the 2012 Excellence in Research Award is March 31, 2012. Please submit nominations or any questions regarding this award to George H. Kendall, Managing Editor, *ANESTHESIOLOGY*, Department of Anesthesiology, Wake Forest University School of Medicine, Medical Center Boulevard, Winston-Salem, North Carolina 27157; e-mail: [managing-editor@anesthesiology.org](mailto:managing-editor@anesthesiology.org).
